# Supplementary material for: Topographic heterogeneity of lung microbiota in end-stage idiopathic pulmonary fibrosis: the Microbiome in Lung Explants-2 (MiLEs-2) study
Source: HighWire-hosted journal article supplement (doi:10.1136/thoraxjnl-2020-214770), 2020-12-02
Supplement: thoraxjnl-2020-214770supp001_data_supplement.pdf [file thoraxjnl-2020-214770supp001_data_supplement.pdf]

1    **Topographic Heterogeneity of Lung Microbiota in End-Stage Idiopathic Pulmonary Fibrosis: The Microbiome in**  
2    **Lung Explants-2 (MiLEs-2) Study.**

3

4    **Online Supplement**

5

6    **Extended Methods: pages 2-11**

7    **Results: pages 12-27**

8    **References: page 28**

9

10

11

12

## 13 EXTENDED METHODS

### 14 Study procedures:

15 We performed sampling of the explanted lung(s) in two different pneumonectomy settings, as previously described: first,  
16 in the operating room for patients who underwent lung transplantation, and second, in the morgue for patients who died  
17 from respiratory failure and had consented to participate in a Rapid Tissue Donation Program at the University of Pittsburgh  
18 Medical Center (UPMC).[1] For patients who underwent lung transplantation, a researcher from our team received the lung  
19 explant in the operating room immediately after transfer of the lung away from the surgical field. Without any break in  
20 sterility, we resected 3-4 pieces of basilar lung tissue from a lower lobe (either left or right, whichever was removed first  
21 during surgery) from all explants included in the study. From a subset of explants, we also resected subpleural tissue from  
22 the right middle lobe or lingula (for right or left lung explants respectively) and the upper lobe. For a smaller subset of  
23 explants, we were also able to collect a bronchial wash specimen (by aspiration of 30 mL of phosphate-buffered saline  
24 instilled into a bronchial segment using a sterile tube) as well as an airway tissue specimen (from a segmental bronchus)  
25 prior to parenchymal tissue sample collection. Samples were frozen in liquid nitrogen and stored at -80°C until processing.  
26 The remaining lung explant(s) were then available to the treating physicians for standard pathology studies. For patients  
27 included in the Rapid Tissue Donation Program, a trained pathologist procured the lungs in the morgue within six hours of  
28 death and provided the explants to our research team immediately after. We performed tissue sampling, processing and  
29 storage in a similar fashion as described above. The University of Pittsburgh's rapid autopsy program is currently limited  
30 to patients with interstitial lung disease or pulmonary arterial hypertension; hence no COPD or CF lungs were collected in  
31 this manner.

32 Our study utilized a retrospective cohort of samples previously collected by a Lung Tissue biospecimen core repository for  
33 use by multiple investigators at our institution. The varied amount of sampling for each lung is primarily a result of  
34 feasibility at the time of procurement, including but not limited to: staff availability, timing of the transplant, and time that  
35 can be dedicated to sample collection prior to time-sensitive experiments on fresh tissue. Additionally, patients undergoing  
36 a single lung transplant (rather than a double lung transplant) only had basilar parenchyma tissue available for sampling.  
37 No bronchial washings or airway tissue was sampled from CORE lungs and no bronchial washings from CF lungs, as this  
38 was not previously part of the protocol for these specimens. We included specimens from explanted lungs procured from  
39 organ donation candidates that were deemed unsuitable for lung transplantation, obtained from the Pennsylvania Center for

40 Organ Recovery and Education (CORE). All patients met brain death criteria, and these samples were anonymized by CORE  
 41 investigators. These organ grafts were rejected for reasons that included donor age, hypoxemia, and mechanical  
 42 complications among others. We excluded cases with clinical or microbiologic evidence of pulmonary infection prior to  
 43 procurement. Details for the reasons of rejection of these organs for lung transplantation are provided in Supplementary  
 44 Table 1:

45 Supplementary Table 1: Reasons of rejection of explanted donor lungs for transplantation:

| <i>Reason for rejection</i>                   | <i>N</i> |
|-----------------------------------------------|----------|
| <i>Age</i>                                    | 2        |
| <i>Persistent hypoxemia</i>                   | 5        |
| <i>Poor respiratory mechanics</i>             | 1        |
| <i>Ex vivo pulmonary edema</i>                | 4        |
| <i>Pulmonary nodules</i>                      | 1        |
| <i>Pulmonary contusions from chest trauma</i> | 3        |
| <i>Size</i>                                   | 1        |
| <i>Aspiration</i>                             | 1        |
| <i>Purulence on bronchoscopy</i>              | 1        |
| <i>Bilateral pulmonary embolism</i>           | 1        |
| <i>Total CORE subjects</i>                    | 20       |

46

47 For CORE lungs, we obtained tissue samples in the operating room under sterile conditions as above. We made every effort  
 48 to sample macroscopically normal appearing lung tissue from the basilar portions of the lower lobes, in order to match the  
 49 corresponding regions sampled from the idiopathic pulmonary fibrosis (IPF) lungs.

50

#### 51 **DNA extraction, 16S rRNA gene sequencing and quantitative PCR:**

52 DNA extraction: We extracted bacterial DNA from ~45 milligrams (mg) of whole lung explant tissue using DNeasy  
 53 Powersoil Kits (Qiagen, Germantown, MD), following the manufacturer's instructions. For each DNA extraction  
 54 experiment, we included negative controls (sterile water instilled in extraction columns) to examine for contamination prior  
 55 and during the DNA extraction phase.

56 16S rRNA gene sequencing: We amplified extracted DNA by PCR using the method of Caporaso et al. and the Q5 HS  
 57 High-Fidelity polymerase (NEB) targeting the V4 hypervariable region of the 16S rRNA gene.[2] We utilized reagent  
 58 controls for each PCR amplification plate to examine for contamination post-DNA extraction. We amplified four microliters

per reaction of each sample with a single barcode in triplicate 25 microliter reactions. Cycle conditions were 98°C for 30s, then 33 cycles of 98°C for 10s, 57°C for 30s, 72°C for 30s, with a final extension step of 72°C for 2 min. We combined triplicates and purified with the AMPure XP beads (Beckman) at a 0.8:1 ratio (beads:DNA) to remove primer-dimers. We quantitated eluted DNA on a Qubit fluorimeter (Life Technologies). We performed sample pooling on ice by combining 20 ng of each purified band. For negative controls and poorly performing samples, we used 20 microliters of each sample. We purified the sample pool with the MinElute PCR purification kit. The final sample pool underwent two more purifications – AMPure XP beads to 0.8:1 to remove all traces of primer dimers and a final cleanup in Purelink PCR Purification Kit (Life Technologies). We quantitated the purified pool in triplicate on the Qubit fluorimeter prior to preparing for sequencing. We prepared the sequencing pool according to instructions by Illumina, with an added incubation at 95°C for 2 minutes immediately following the initial dilution to 20 picomolar. We then diluted the sequencing pool to a final concentration of 7 pM + 15% PhiX control. Amplicons were sequenced on the Miseq platform.

**Quantitative PCR (qPCR):** We performed qPCR reactions of the V3-V4 region of the 16S rRNA gene to quantify the bacterial load in each sample, with the BactQuant protocol.[2] PCR reactions were prepared in a total volume of 20µL, which consisted of 2µL of 10XPCR buffer, 3.5 mmol/L MgCl<sub>2</sub>, 0.2 mmol/L deoxynucleoside triphosphate, 0.5 µmol/L forward and reverse primers, 0.225 µmol/L probe, 0.75 U of Platinum Taq polymerase (Invitrogen), and 2µL of each DNA. The forward and reverse primers and the probe sequences that were used to amplify DNA templates encoding the V3-V4 region of the 16S rRNA gene were identical to those previously described.[2] The DNA was amplified in duplicate, and mean values were calculated. A standard curve was created from serial dilutions of plasmid DNA containing known copy numbers of the template. The assays were performed on the LightCycler System (Roche) using the following PCR conditions: 95°C for 5 min, followed by 50 cycles at 95°C for 15 s and at 60°C for 1 min. SYBR GREEN-based qPCR of human Glyceraldehyde 3-phosphate dehydrogenase (*GAPDH*) gene was performed to detect and quantify human DNA in available samples on LightCycler System (Roche, Basel, Switzerland).

81

## 82 **Protocol optimization:**

83 In previous work from our group,[1] we demonstrated extremely low bacterial DNA amplification from IPF explants, raising  
84 concerns about the feasibility of studying low biomass communities from explanted lung tissue.[3, 4] To examine for  
85 potential methodological issues and define optimal methods for studying low biomass communities in lung tissue

specimens, we conducted a series of methodological experiments prior to defining the final protocol for the MiLEs-2 study processes described above. Specifically, we examined for the presence of PCR inhibitors of bacterial DNA amplification in human lung tissue (CORE lungs or IPF lungs) as well as for the optimal method of sampling tissue specimens (tissue swabs as performed in the study by Pragman et al vs. whole tissue DNA extracts).[5] In these experiments, we utilized our standard PCR amplification protocol of the V4 hypervariable region of the 16S rRNA gene [2], and examined for the detection of corresponding band of the amplified PCR product in electrophoresis for each experimental condition.

a. Examination for PCR inhibitors in CORE lung tissue

To determine whether lung tissue specimens contained inhibitors that interfered with the amplification of the 16S rRNA gene by PCR (PCR inhibitors), we conducted the following experiments. First, we spiked CORE lung tissue specimens with bacterial cells by using varying amounts of ZymoBIOMICS Microbial Community Standards (Zymo, USA). Tissue specimens were spiked with incremental amounts of the Zymo community standard solution: 15µl, 30µl, 45µl, 60µl, and 75µl. Then, these spiked lung tissue specimens underwent whole genomic DNA (gDNA) extraction with Qiagen's DNeasy PowerSoil Kit (Qiagen, USA). After the addition of C1, samples were heated for 15 minutes at 65°C, and vortexed for 20 minutes. All other steps were performed according to the kit's protocol. Extracted gDNA was amplified using 4µl of template for a total reaction volume of 25µl. The thermal cycling program was as follows: initial activation at 98°C for 30 seconds, followed by 25 cycles of 98°C for 10s, 57°C for 30s, and 72°C for 30s, with final elongation of 72°C for 2 minutes. To test the success of the PCR we used gel electrophoresis. Every spiked tissue sample displayed bright bands of amplified DNA (e-Methods Figure 1), thus ruling out the presence of PCR inhibitors at concentrations sufficient to inhibit the amplification of bacterial DNA in the amounts available in the Zymo community standard.

105

106

107 **e-Methods Figure 1. Gel electrophoresis of the PCR amplified V4 subunit of the 16S rRNA gene for CORE tissue**  
108 **specimens spiked with Zymo bacterial cells.** Lane 1: Ladder. Lanes 2, 4, 6, 8, 10: CORE tissue extractions. Lanes 3, 5,  
109 7, 9, 11: spiked CORE tissues ranging from 15ul Zymo cells, to 75ul Zymo cells. Lane 12: Extraction negative control.  
110 Lane 13: PCR positive control. Lane 14: PCR negative control. Lane 15: Ladder

111

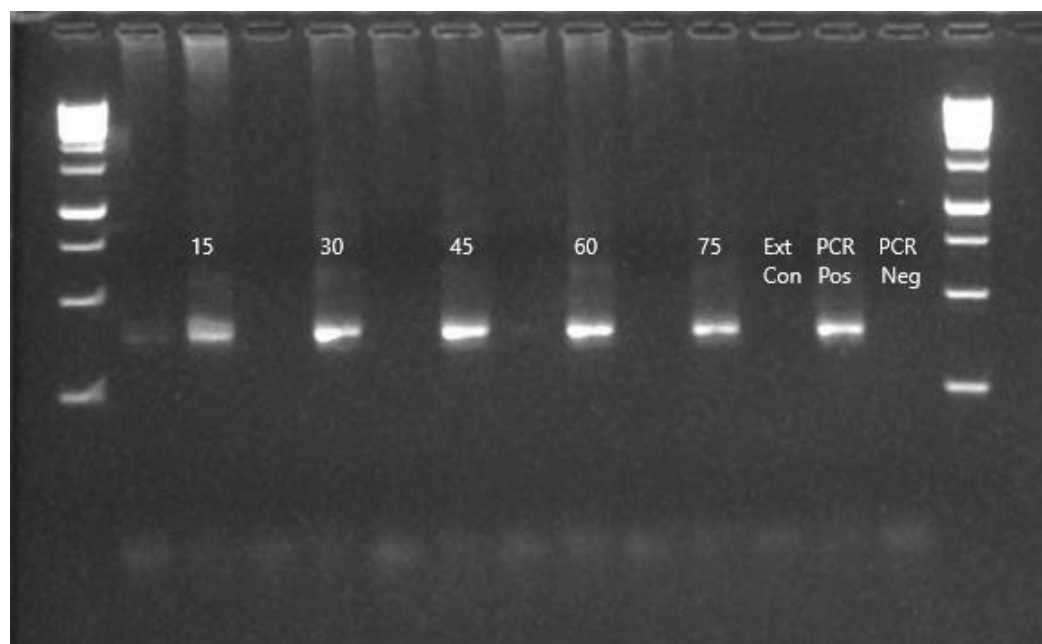

113 b. Examination for PCR inhibitors in IPF lung tissue

114 To test for PCR inhibitors in end-stage IPF lung tissues, specimens were spiked with either 15µl or 75µl of bacterial cells  
115 from the Microbial Community Standard (Zymo, USA). DNA extractions were completed as described above. PCR was  
116 performed using 4µl of template and 25 cycles of the above described thermal cycling program. All tissues spiked with  
117 Zymo cells yielded visible bands using gel electrophoresis (e-Methods Figure 2). Therefore, we concluded that IPF lung  
118 tissues do not contain sufficient amounts of PCR inhibitors to inhibit 16S rRNA gene amplification at the concentrations  
119 used.

120

121 **e-Methods Figure 2. Gel electrophoresis of the PCR amplified V4 subunit of the 16S rRNA gene for IPF tissues**  
122 **spiked with Zymo bacterial cells.** Lane 1: Ladder. Lanes 2-11: spiked IPF tissues alternating between 15µl and 75µl spike-  
123 in samples. Lane 12: Extraction positive control (75ul of Zymo cells). Lane 13: Extraction negative control. Lane 14: PCR  
124 positive control. Lane 15: PCR negative control. Lane 16: Ladder.

125

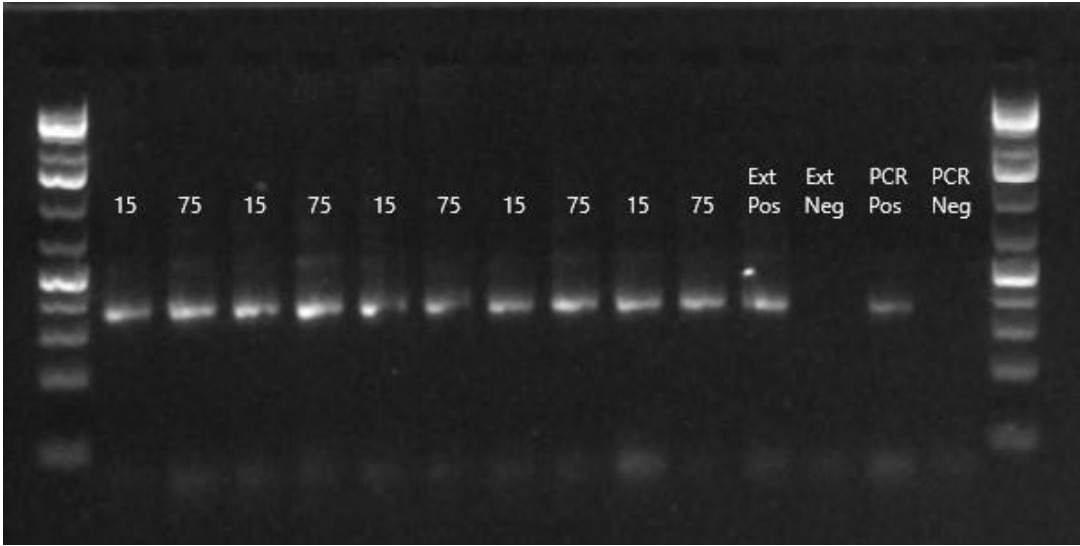

126

127 c. Comparison of PCR amplification yield between tissue swabs and whole tissue extractions – derivation of optimal  
128 number of PCR cycles:

129 A plausible obstacle in successfully amplifying bacterial DNA from whole human tissue extractions is the high ratio of  
130 human to microbial DNA in gDNA extracts. To address this issue, tissue swabs have been proposed in an effort to sample  
131 retrievable bacteria from the tissue surface and avoid the large amounts of human DNA in the gDNA extracted pool. To  
132 compare the yield of tissue swabs vs. whole tissue extractions, we swabbed the surface area of five CORE lung tissue  
133 samples. These swabs were extracted in addition to the resected sections of lung tissues weighing approximately 45mg each.  
134 PCR was performed using 8µl of template for a total reaction volume of 25µl. The thermal cycling program used is as  
135 described above. Using gel electrophoresis, no samples yielded visible bands of amplified DNA using 25 cycles (e-Methods  
136 Figure 3) or 30 cycles of the above-mentioned thermal cycling program (e-Methods Figure 4). Using 33 cycles, all samples  
137 yielded visible bands of amplified DNA (e-Methods Figure 5). Therefore, we proceed with whole tissue sample extractions  
138 and 33 cycles of PCR to maximize the yield of amplified bacterial DNA from each sample.

139 **e-Methods Figure 3. Gel electrophoresis of the PCR amplified V4 subunit of the 16S rRNA gene for CORE tissues**  
140 **and swabs using 25 cycles and 4µl of template.** Lane 1: Ladder. Lanes 2-11: CORE lung extractions alternating between  
141 swabs and whole tissue (WT) extractions. Lane 12-13: Extraction negative controls. Lane 14: PCR positive control. Lane  
142 15: PCR negative control. Lane 16: Ladder.

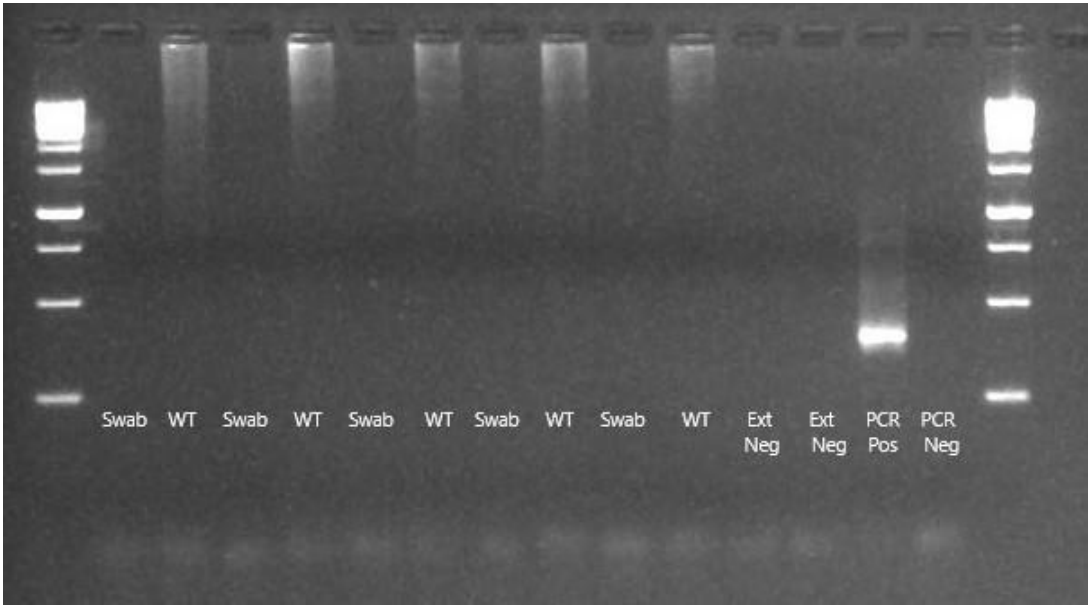



145 **e-Methods Figure 4. Gel electrophoresis of the PCR amplified V4 subunit of the 16S rRNA gene for CORE tissues**  
146 **and swabs using 30 cycles and 8µl of template.** Lane 1: Ladder. Lanes 2-11: CORE lung extractions alternating between  
147 swabs and whole tissue (WT) extractions. Lane 12-13: Extraction negative controls. Lane 14: PCR positive control. Lane  
148 15: PCR negative control. Lane 16: Ladder.

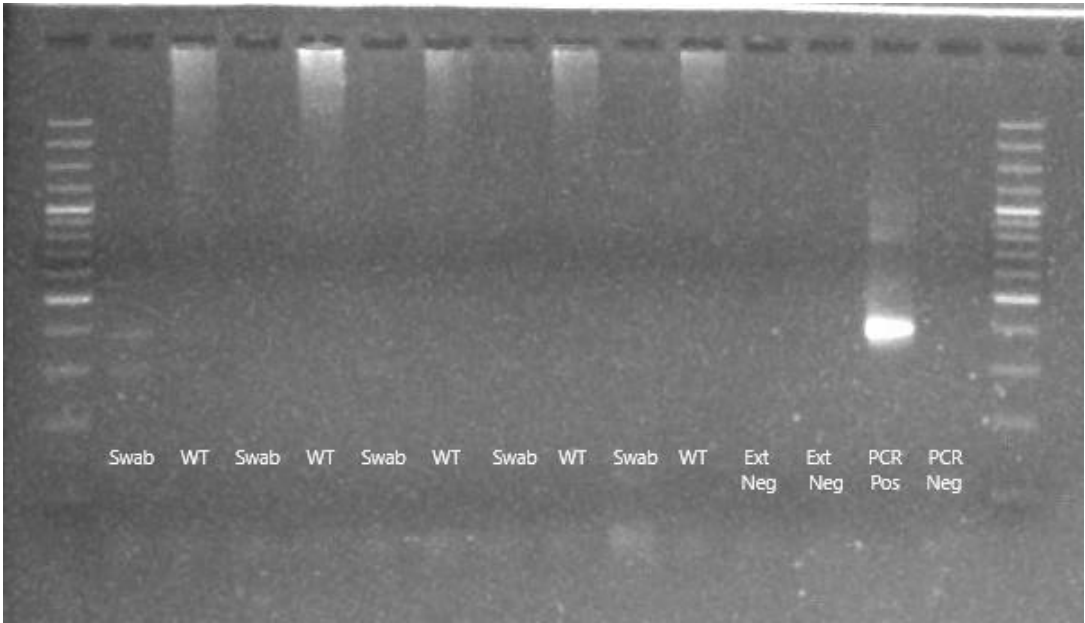

151 **e-Methods Figure 5. Gel electrophoresis of the PCR amplified V4 subunit of the 16S rRNA gene for CORE tissues**  
152 **and swabs using 33 cycles and 8µl of template.** Lane 1: Ladder. Lanes 2-11: CORE lung extractions alternating between  
153 swabs and whole tissue (WT) extractions. Lane 12-13: Extraction negative controls. Lane 14: PCR positive control. Lane  
154 15: PCR negative control. Lane 16: Ladder.

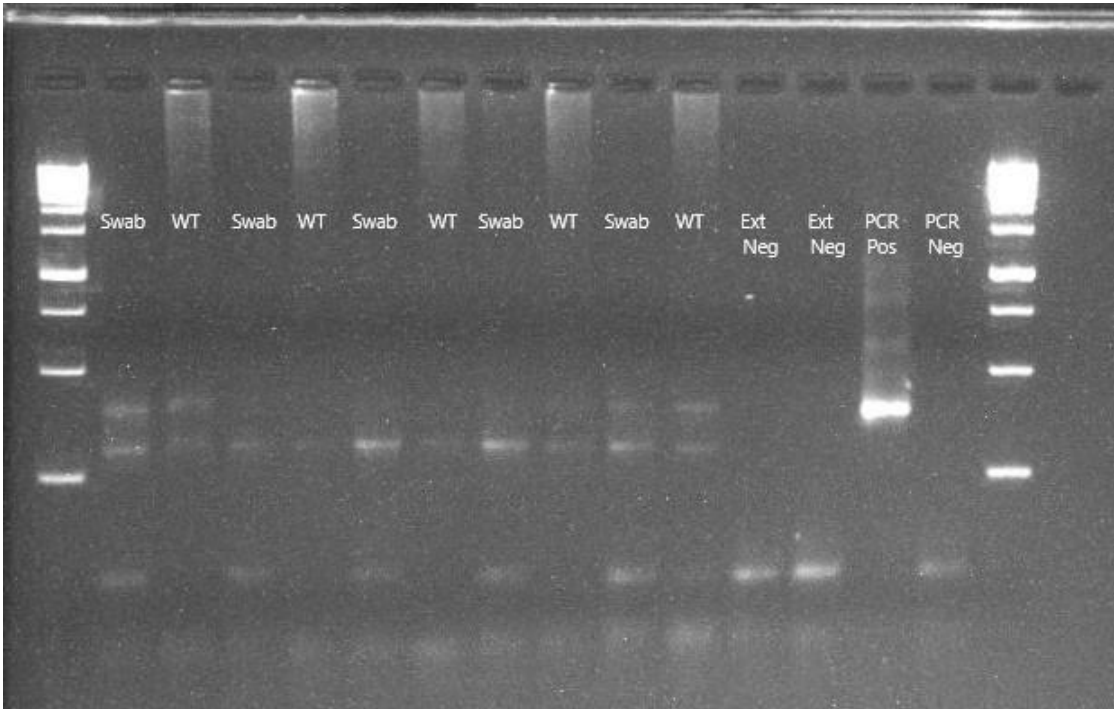

158 **Analytics:**159 a. 16S annotation and the making of operational taxonomic unit (OTU) table

160 Sequences from the pooled sequencing run were demultiplexed into individual sample/replicate fastq files. Each fastq file  
161 was then processed through the Center for Medicine and the Microbiome (CMM) custom modular read QC pipeline that  
162 was configured to perform the following steps: low complexity filtering, QV trimming, Illumina sequencing adapter  
163 trimming, and 16S primer trimming. Mated pair forward and reversed reads were joined into contigs with the make.contigs  
164 function in Mothur, followed by additional screening with the following criterion: minimum required overlap = 25 bp,  
165 proportion overlap mismatch > 20%, maximum N's allowed = 4, and a read length minimum of 125 bp. Then, consensus  
166 sequences passing screening were then passed through CMM's 16S clustering and annotation pipeline, a Mothur-dependent  
167 wrapper designed to streamline and automate the execution of the following Mothur steps in version v.1.39.1: unique.seqs,  
168 align.seqs, screen.seqs, filter.seqs, second uniq.seqs, pre.cluster, chimera.uchime, remove.seqs, classify.seqs, dist.seqs,  
169 cluster, make.shared, and classify.otu. *Mothur* output files were then reformatted to sample x category (taxonomic levels or  
170 OTU at 97% sequence similarity). For downstream statistical modeling and analyses, we utilized taxonomic tables at the  
171 genus level, with taxonomic assignments performed using a naïve Bayes k-mer classifier in conjunction with the Ribosomal  
172 Database Project (RDP) 16S rRNA gene sequences. Details of the custom analytical pipeline used are provided in  
173 <https://github.com/MedicineAndTheMicrobiome/AnalysisTools>

174 b. Cluster derivation

175 In order to agnostically examine for distinct clusters of microbial composition (“meta-communities”) in our samples, we  
176 applied unsupervised Dirichlet Multinomial Models (DMM) with Laplace approximations to define the optimal number of  
177 clusters in our dataset. DMM clusters were derived in a trimmed dataset following exclusion of low abundance taxa, which  
178 could represent experimental noise and not true biological signal. We therefore excluded taxa whose relative abundance did  
179 not exceed 20% in any of the 62 IPF samples, which resulted in a trimmed dataset with 76% of the total reads and a sum of  
180 40 distinct genera for derivation of the DMM clusters. Application of the DMM models resulted into an interpretable  
181 classification of our dataset in two distinct clusters, which were then examined further for associations with clinical  
182 variables.

183

184     **RESULTS**

185     **Supplemental Figure 1.** Bacterial load by qPCR endpoint fluorescence (log transformed) in bronchial washings, airway  
186     tissue and basilar parenchyma tissue in IPF (A) and COPD (B) samples. Higher qPCR endpoint fluorescence indicates  
187     higher bacterial load. Dashed lines connect samples obtained from the same patient. Pairwise p-values obtained from  
188     Wilcoxon tests. \*= p<0.05, \*\*\*= p<0.001 , \*\*\*\*= p<0.0001. IPF, idiopathic pulmonary fibrosis; COPD, chronic obstructive  
189     pulmonary disease.

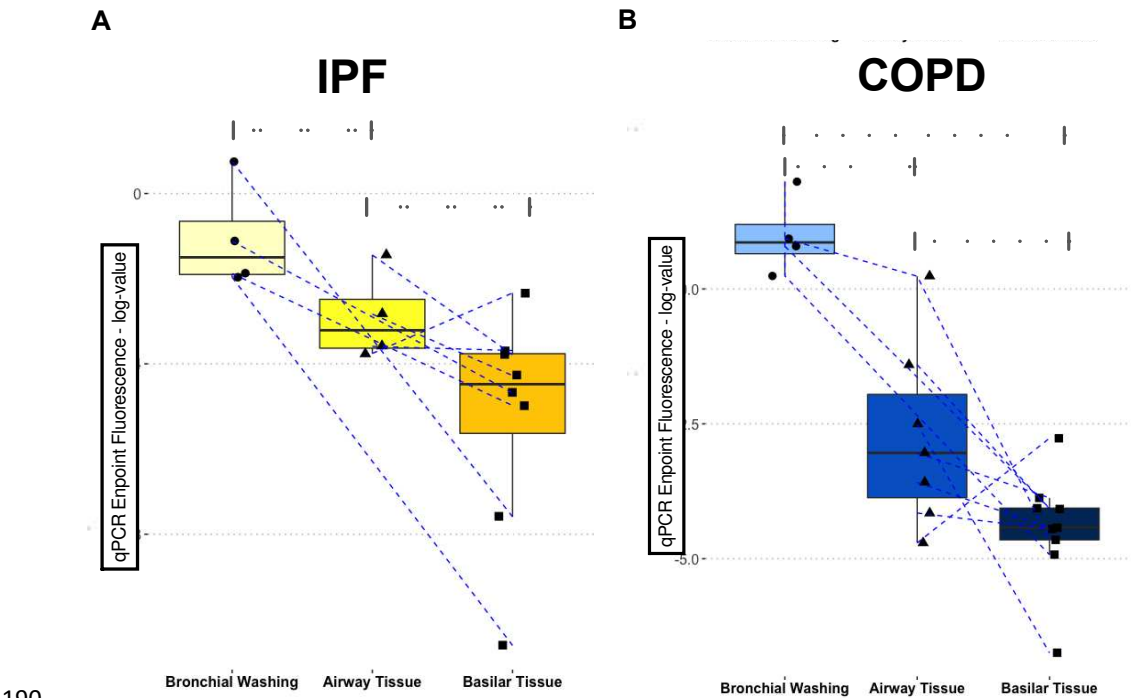

193 **Supplemental Figure 2:** Bronchial washings samples have lower amounts of human DNA (higher cycle of detection for  
194 qPCR of the human *GAPDH* gene) compared to airway and parenchymal tissue samples (Wilcoxon p-values < 0.0001).  
195 Dashed lines connect samples obtained from the same patient. Higher cycle of detection during qPCR on the y-axis indicates  
196 lower amount of target DNA.

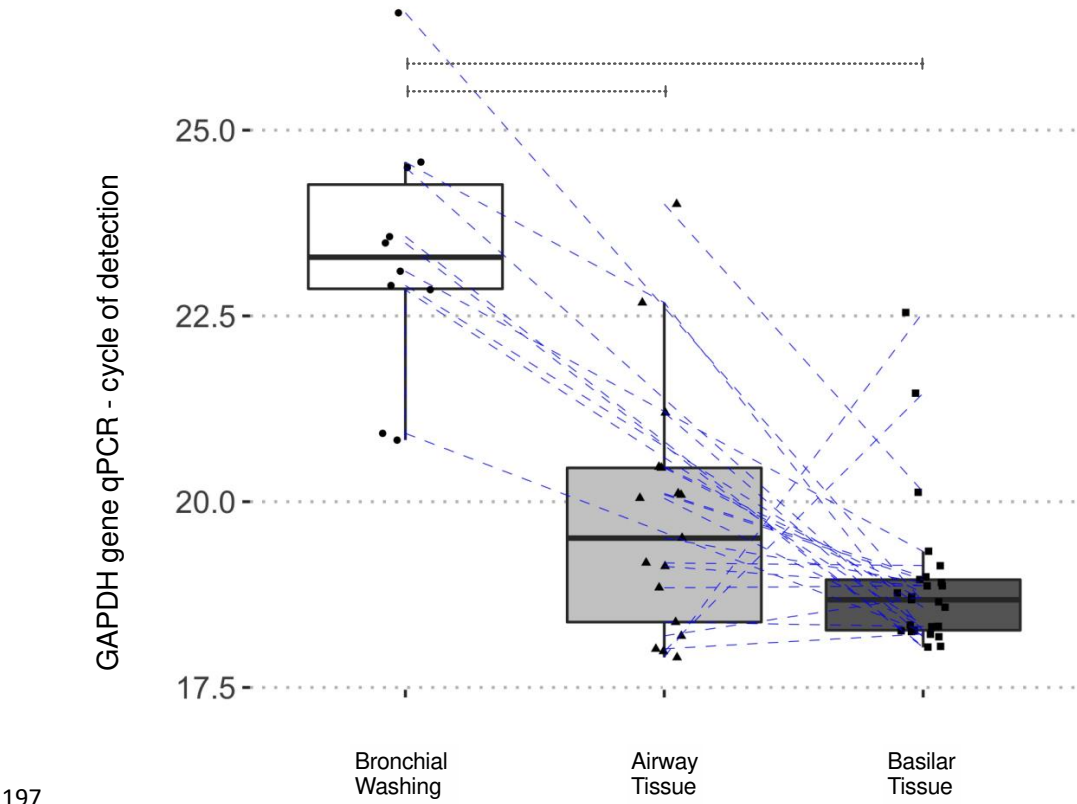

200 **Supplemental Figure 3.** Significant taxonomic composition differences by sample and disease type. Beta diversity, as  
201 measured by Bray-Curtis dissimilarity in basilar parenchyma tissue of IPF, CTD-ILD, COPD, CF, and CORE lungs, BAL  
202 samples from healthy controls, and reagent control samples during DNA extraction and PCR amplification steps. Reagent  
203 controls (experimental negative controls) appeared more similar with parenchymal tissue samples of IPF, CTD-ILD and  
204 COPD. Permanova; permutation analysis of variance; IPF, idiopathic pulmonary fibrosis; CTD-ILD, connective tissue  
205 disease-associated interstitial lung disease; COPD, chronic obstructive pulmonary disease; CF, cystic fibrosis; CORE,  
206 Center for Organ Recovery and Education; MDS1, primary NMDS axis; MDS2, secondary NMDS axis; NMDS, non-metric  
207 multidimensional scaling.

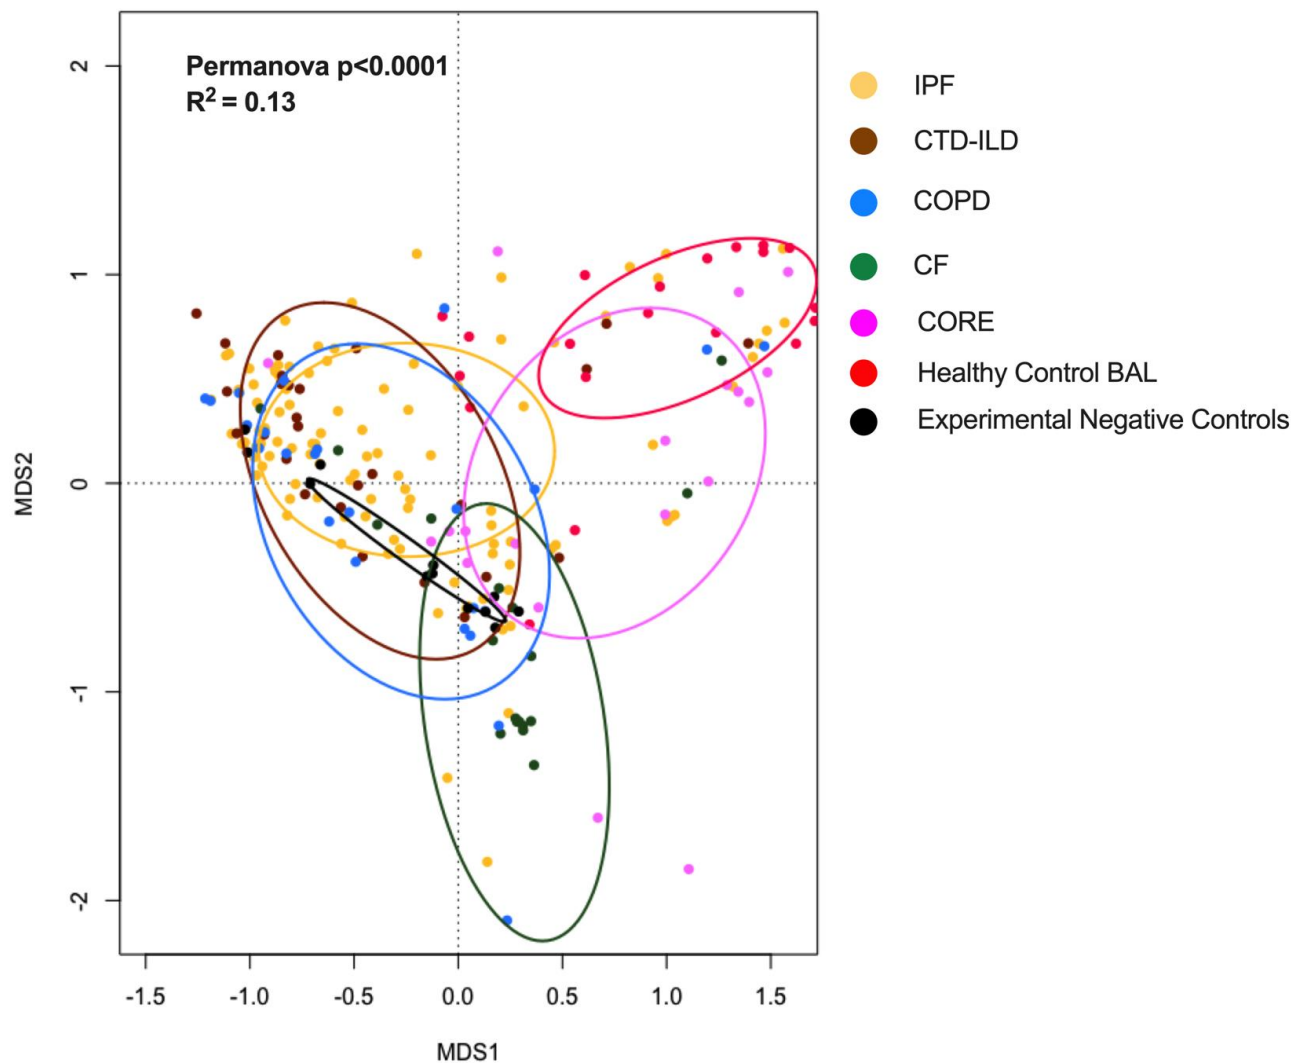

**Supplemental Figure 4.** Taxonomic composition of all basilar parenchyma samples for IPF subjects. IPF taxonomic composition revealed communities with low abundance of typical respiratory microbiota microbes (depicted in blue color).

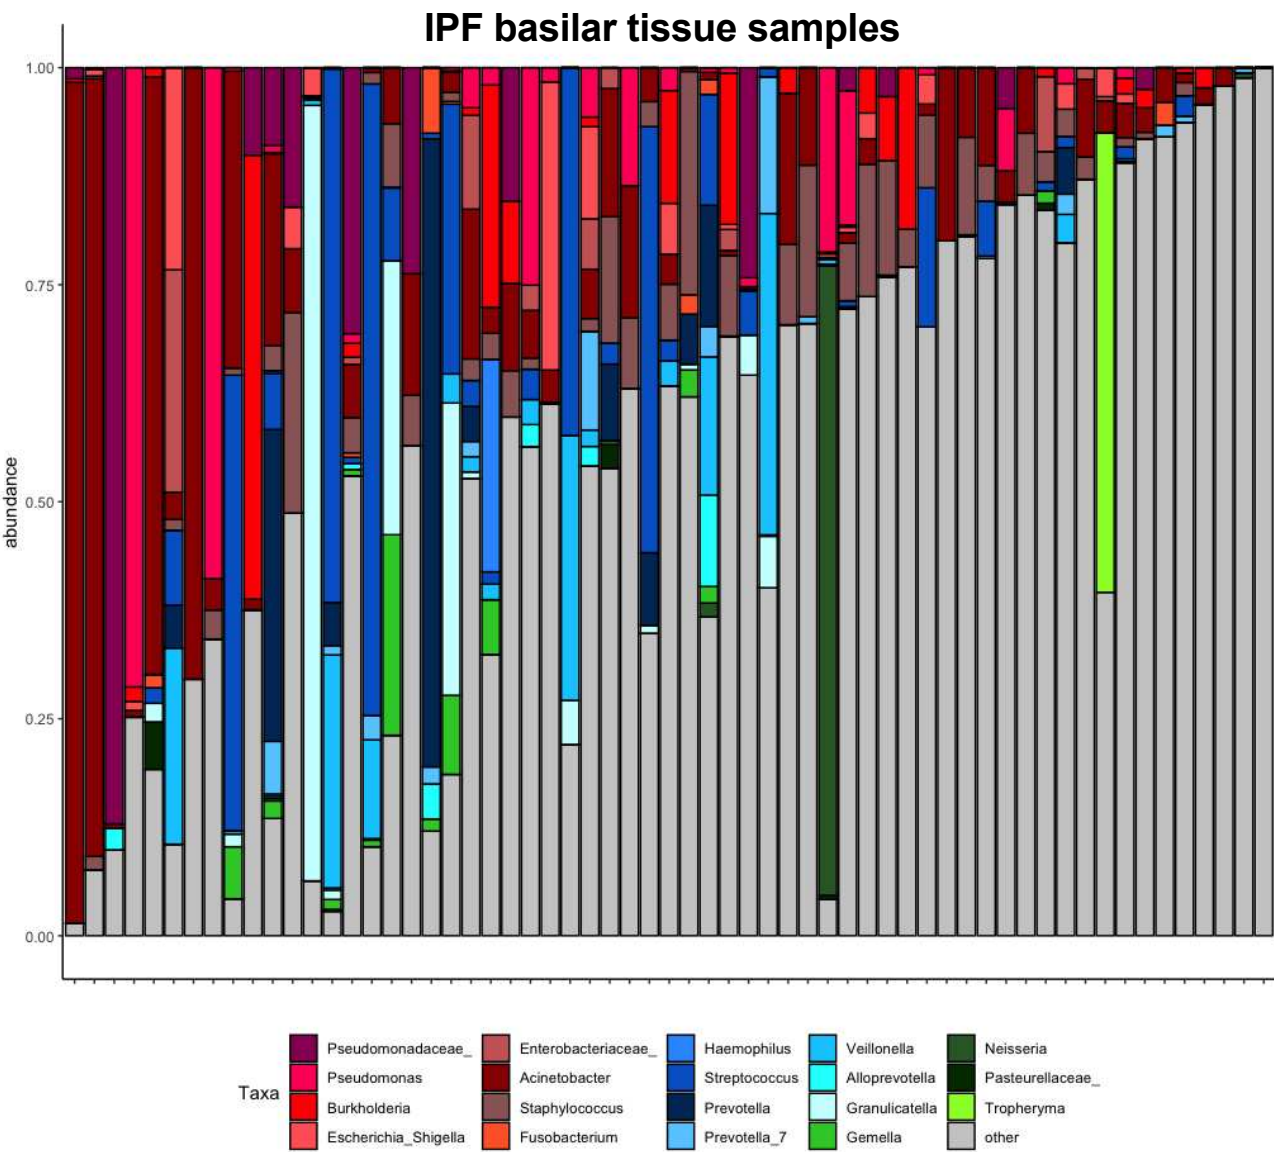



215 **Supplemental Figure 5.** Taxonomic composition of all basilar parenchyma samples for connective tissue disease-  
216 associated interstitial lung disease subjects.

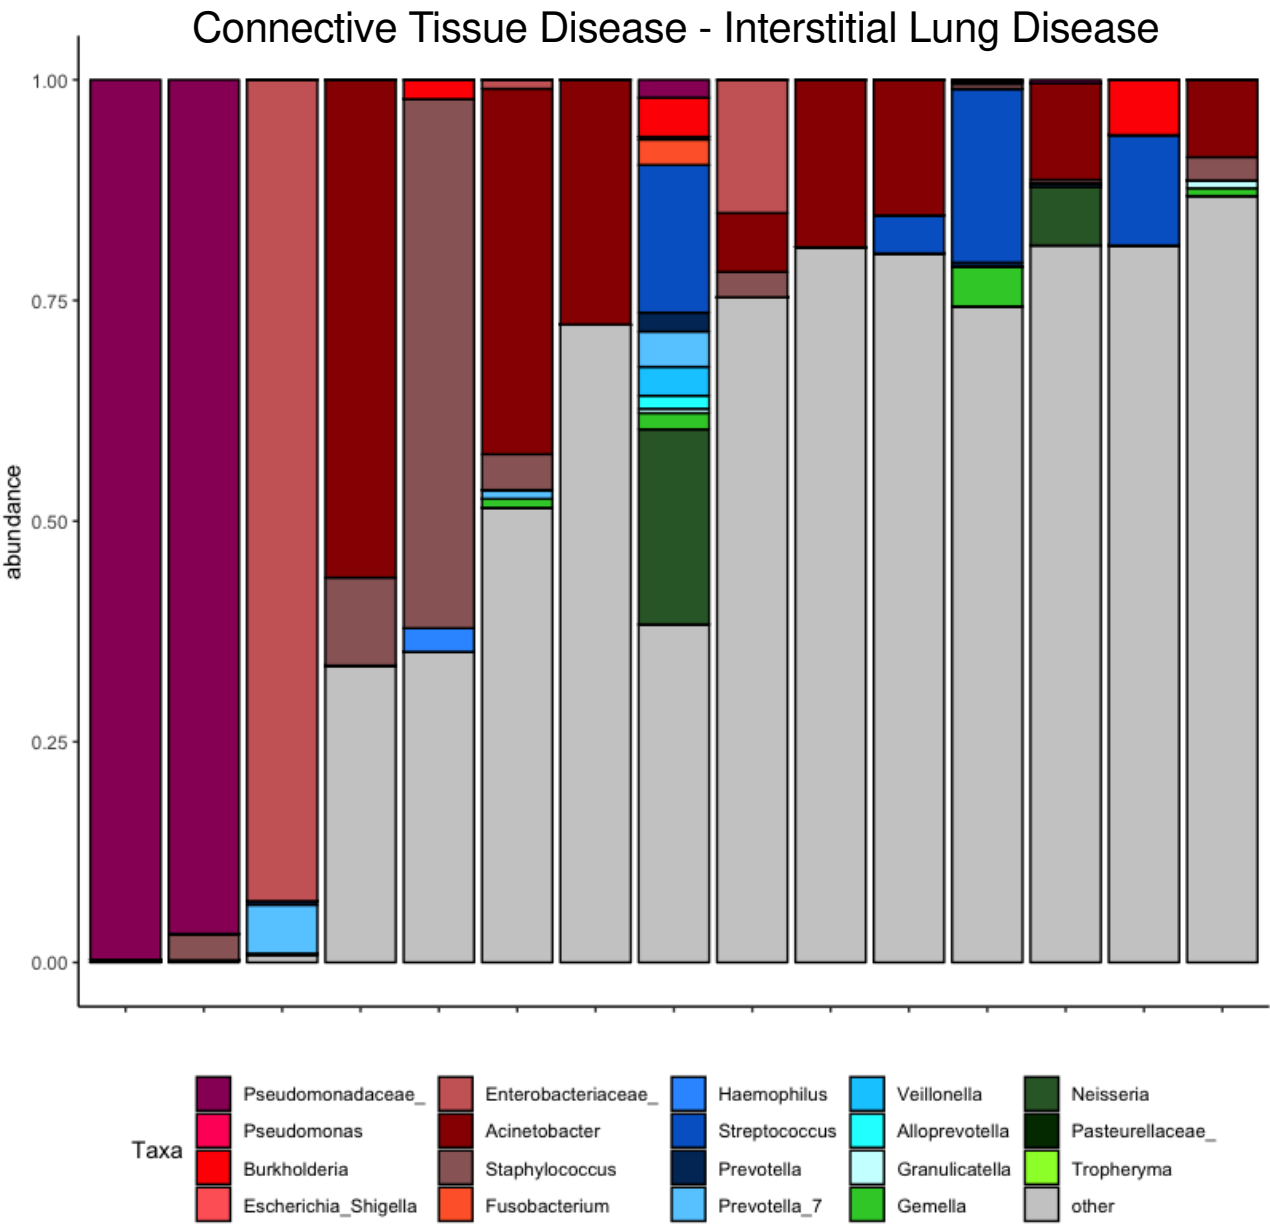

220 **Supplemental Figure 6.** Taxonomic composition of all basilar parenchyma samples for chronic obstructive pulmonary  
221 disease subjects.

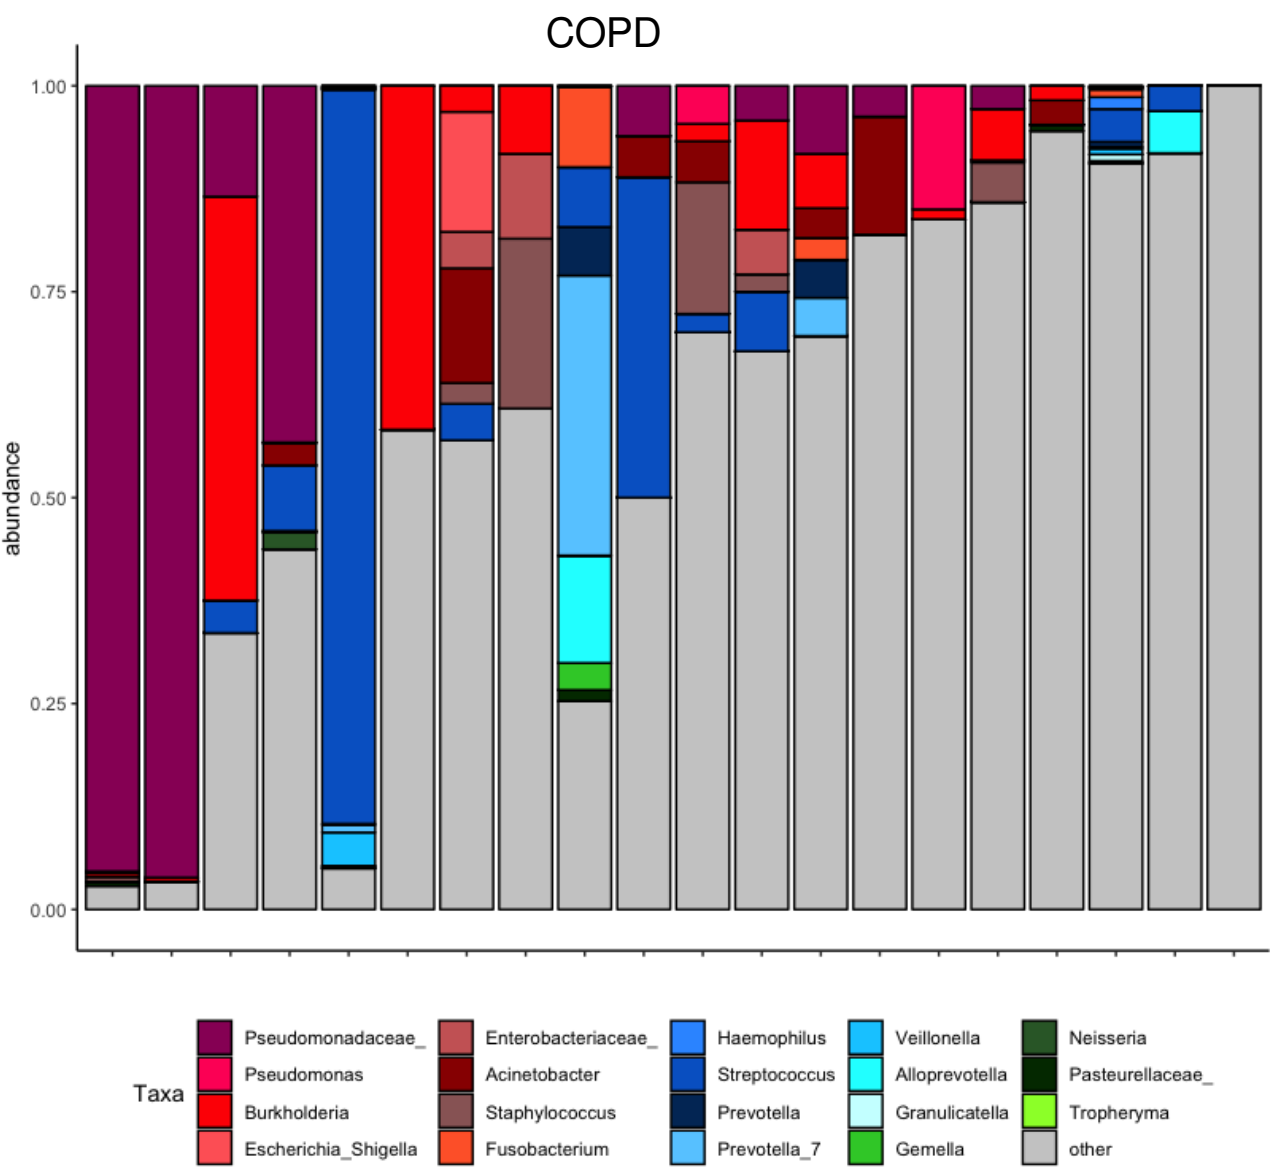

226     **Supplemental Figure 7.** Taxonomic composition of all basilar parenchyma samples for cystic fibrosis subjects.

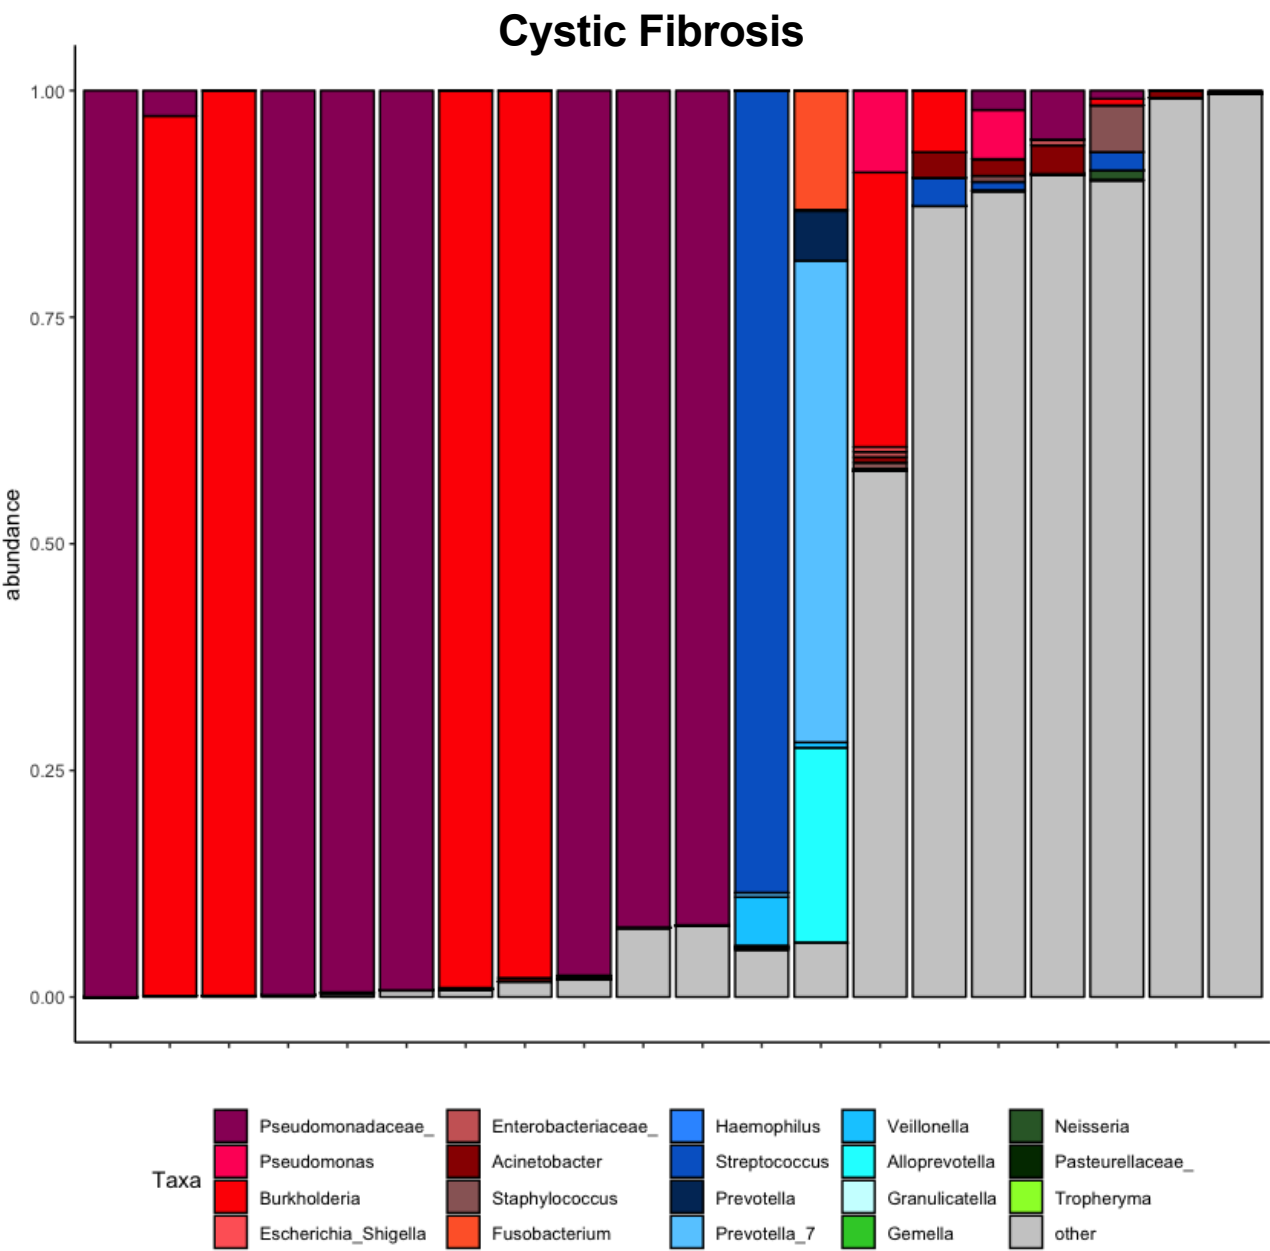

229     **Supplemental Figure 8.** Taxonomic composition of all basilar parenchyma samples for CORE subjects.

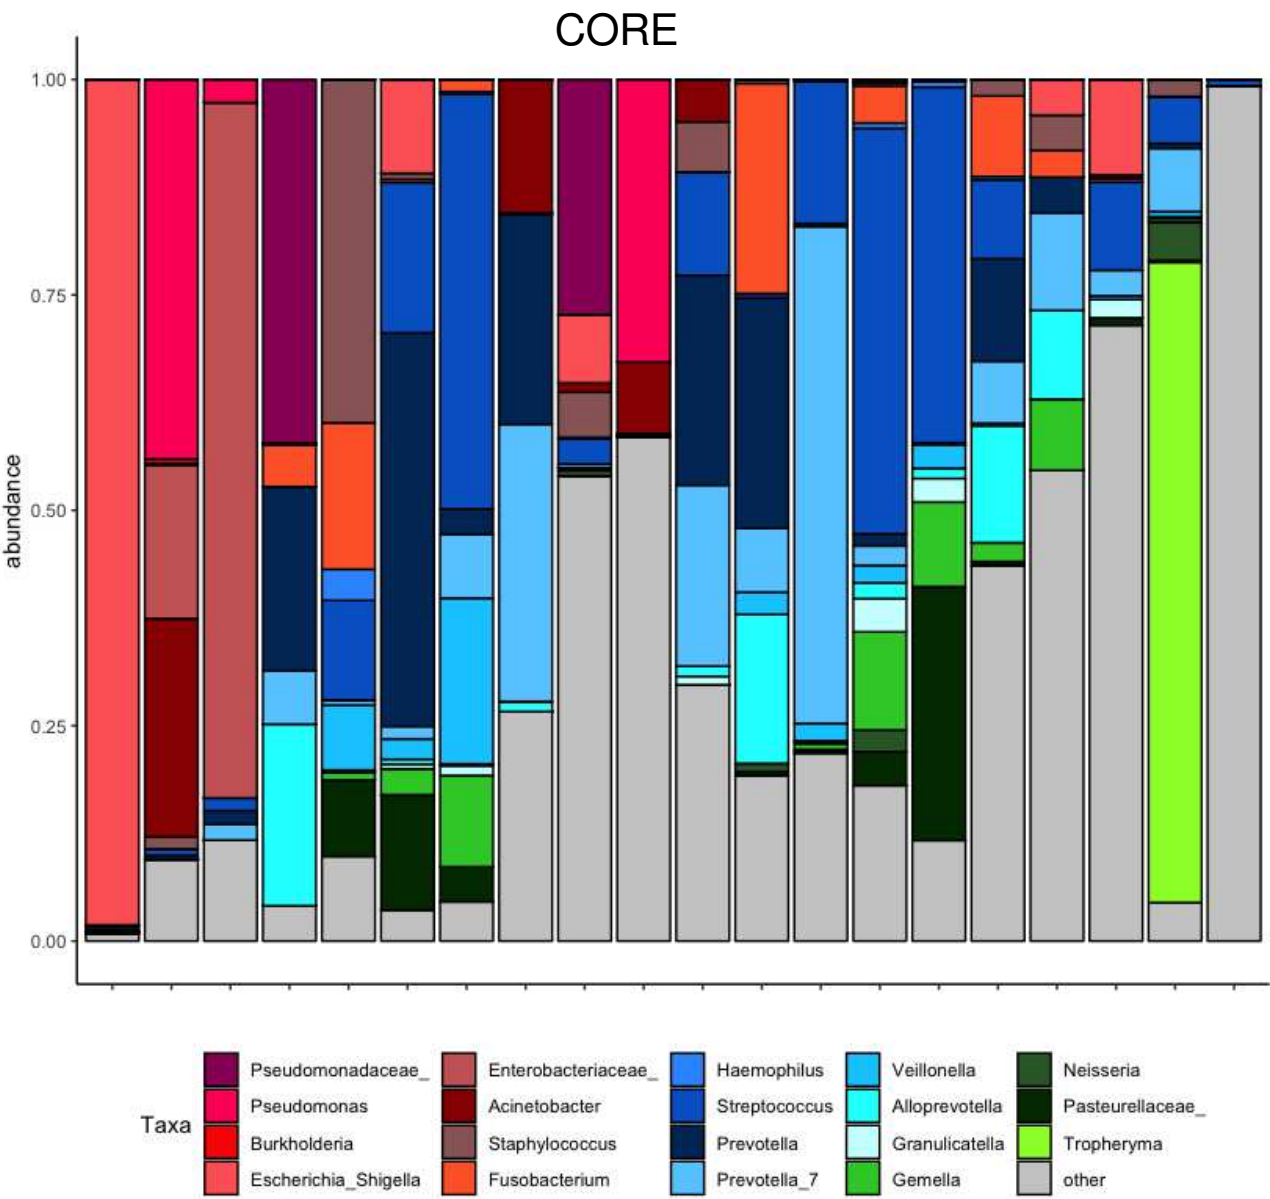

232 **Supplemental Figure 9.** Taxonomic composition of all bronchoalveolar lavage samples for healthy controls.

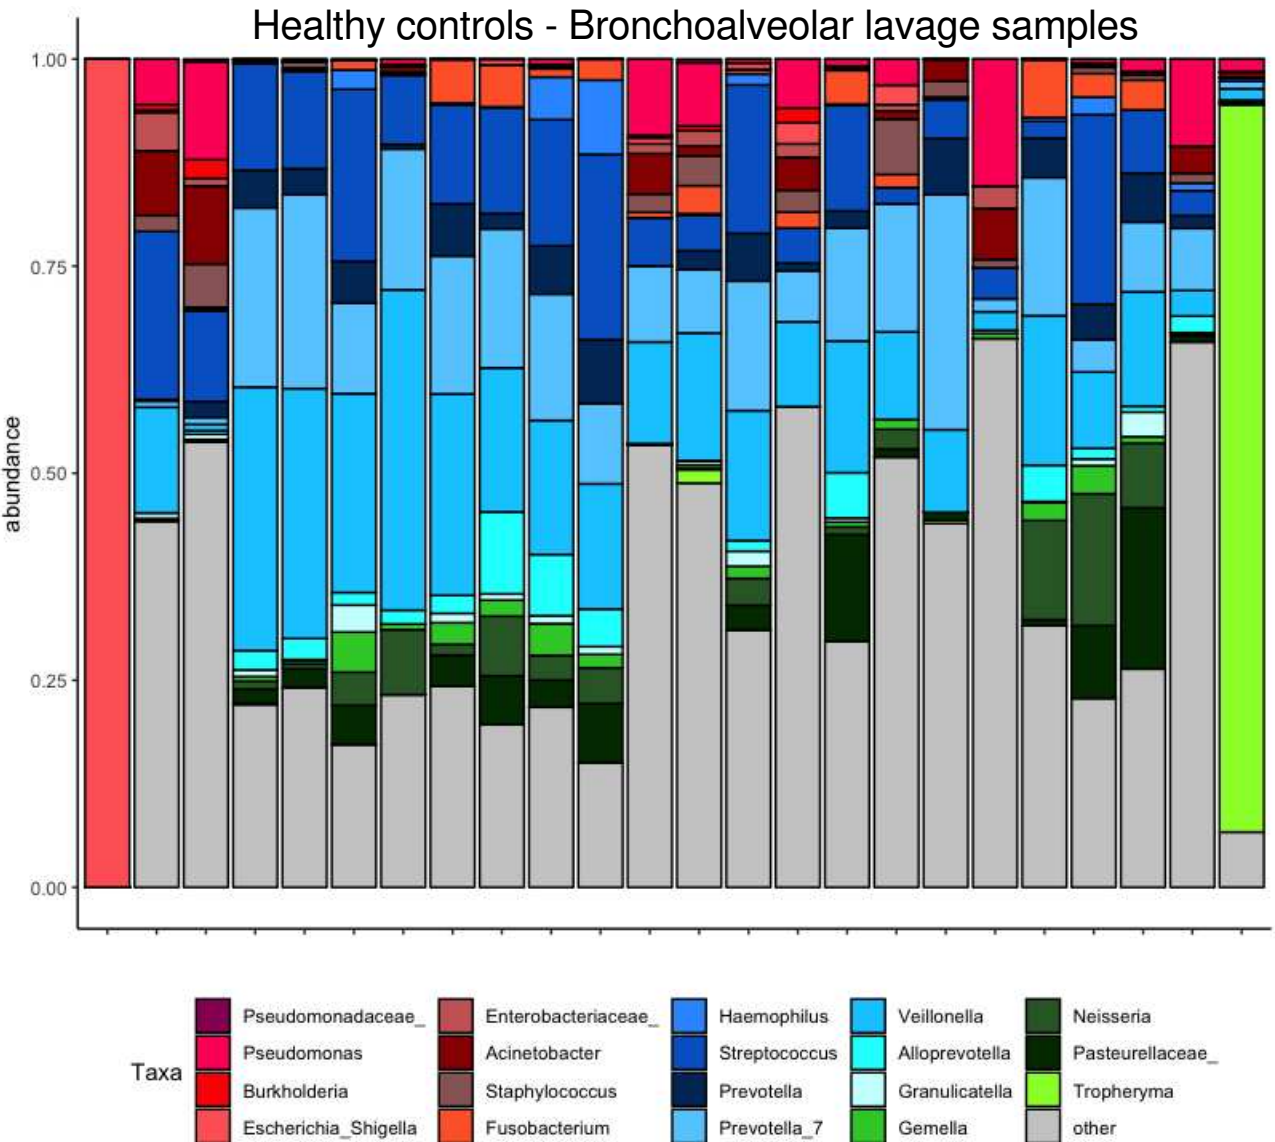

236 **Supplemental Figure 10.** Taxonomic composition of 17 cystic fibrosis basilar parenchyma and 4 cystic fibrosis airway  
237 tissue samples, demonstrating very low diversity communities in most samples. In 80% of these cases the dominant taxon  
238 by sequencing corresponded to the clinically isolated pathogen identified by airway cultures at the time of transplantation.

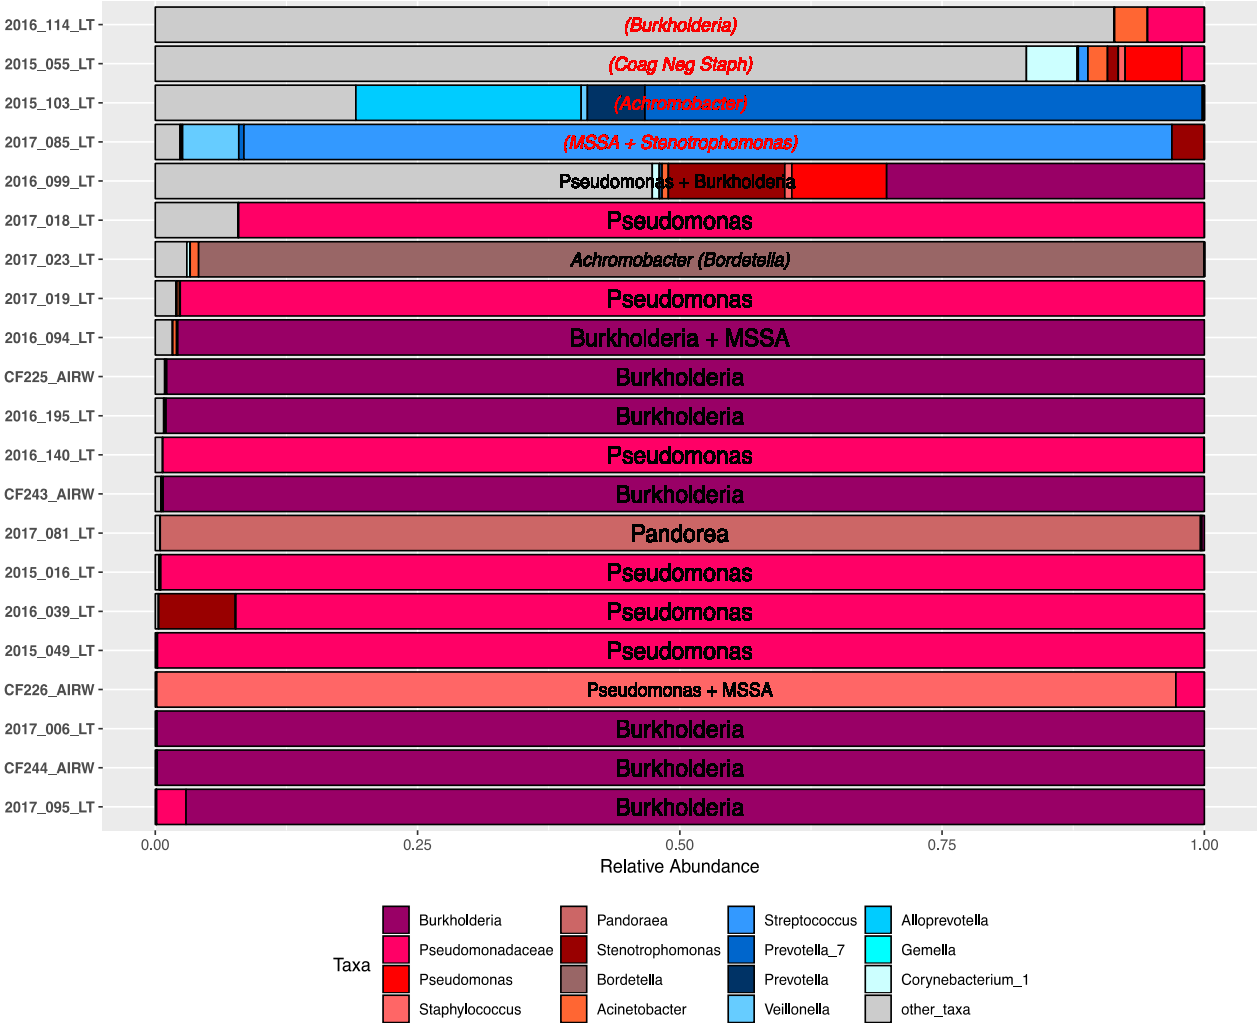

242     **Supplemental Figure 11.** Explant histopathology in five CORE samples and four matched apical and basal IPF samples.

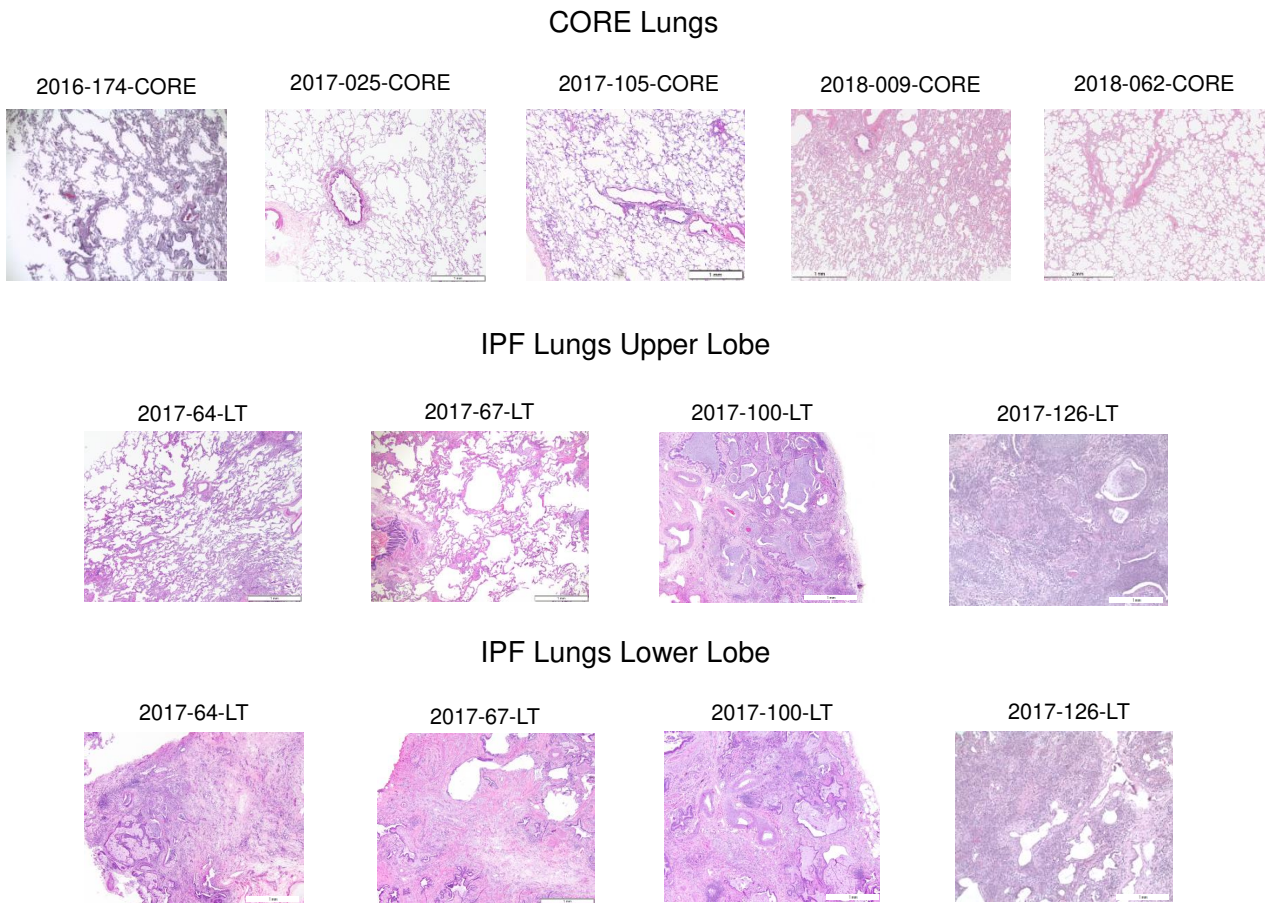

243

244     Thoracic Pathology reports on IPF samples:

245     2017-64-LT: usual interstitial pneumonia (UIP), more diffuse in lower lobe than upper lobe. Diffuse alveolar damage in

246     lower lobe suggestive of acute exacerbation.

247     2017-67-LT: upper lobe with scarring around the airways in a former smoker. No UIP or fibrosis in upper lobe. Lower

248     lobe with advanced diffuse usual interstitial pneumonia, honeycomb cysts, bronchial metaplastic cells, and some smooth

249     muscle metaplasia.

250     2017-100-LT: complete replacement of the lung architecture by honeycomb cysts and end stage lung disease

251     2017-126-LT: usual interstitial pneumonia in upper and lower lobes with bronchial metaplasia and mild lymphocytic

252     infiltrate

253

254

255 **Supplemental Figure 12.** Bacterial burden by qPCR endpoint fluorescence in upper, middle (or lingula), and lower lobe  
256 parenchyma IPF samples. Dashed lines connect lobar samples obtained from the same patient. IPF, idiopathic pulmonary  
257 fibrosis.

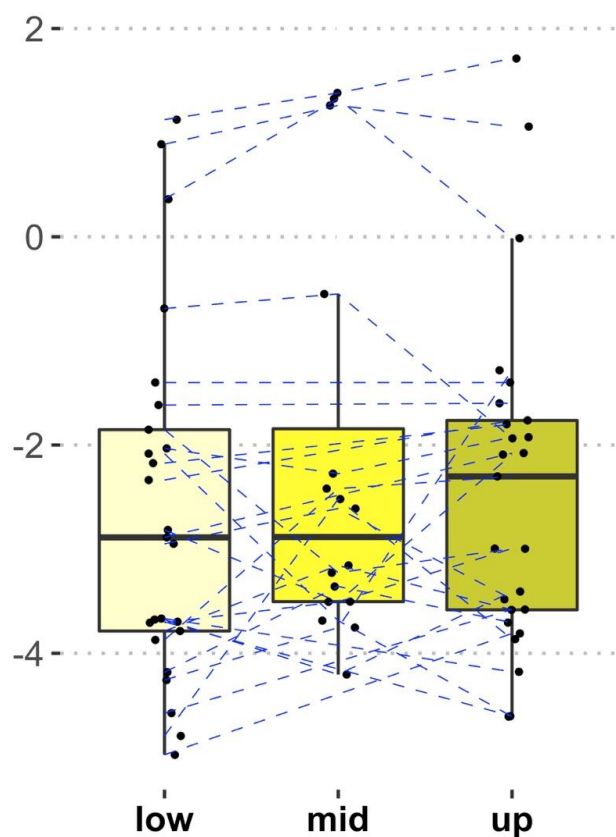

258

259

260



261 **Supplemental Figure 13.** Taxonomic composition by anatomic lobe of select high bacterial load IPF,  
262 idiopathic pulmonary fibrosis.

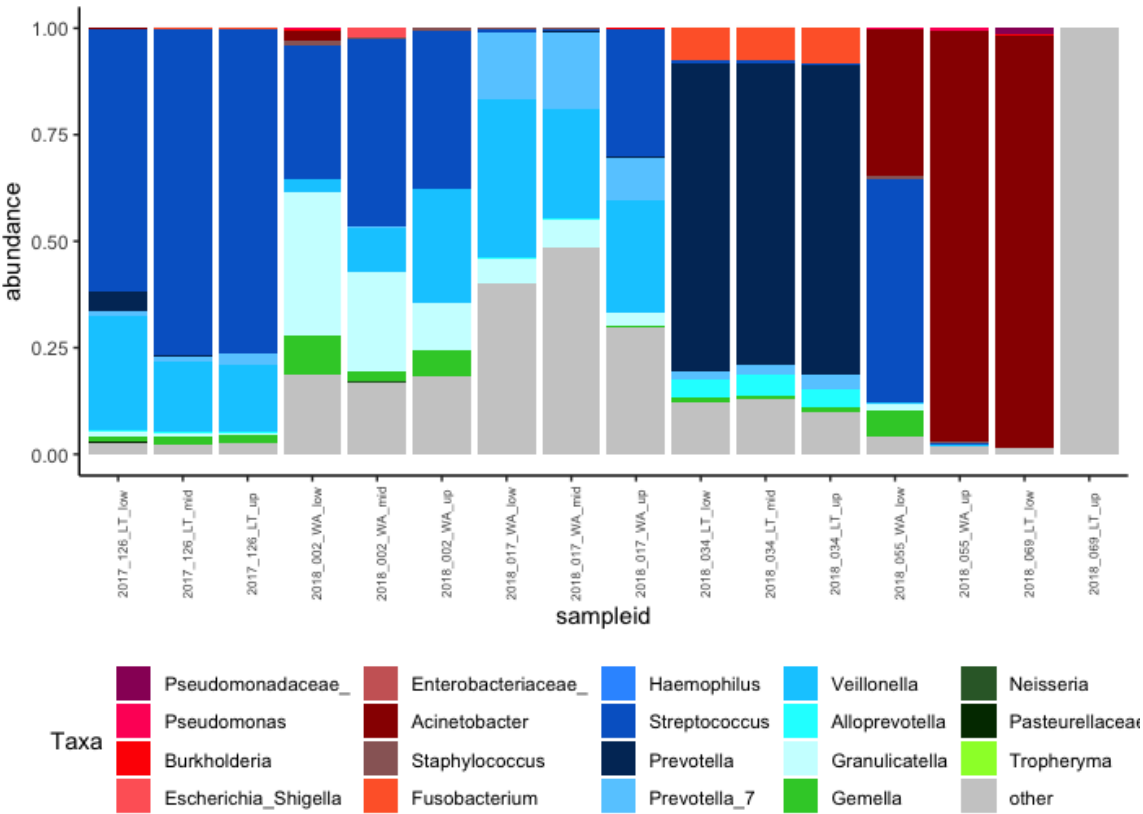

267 **Supplemental Figure 14.** Cluster 2 specimens from upper lobe or middle/lingular lobes had higher bacterial load by  
268 qPCR (Panel A) and differential taxonomic composition compared to corresponding cluster 1 specimens in patients with  
269 IPF.

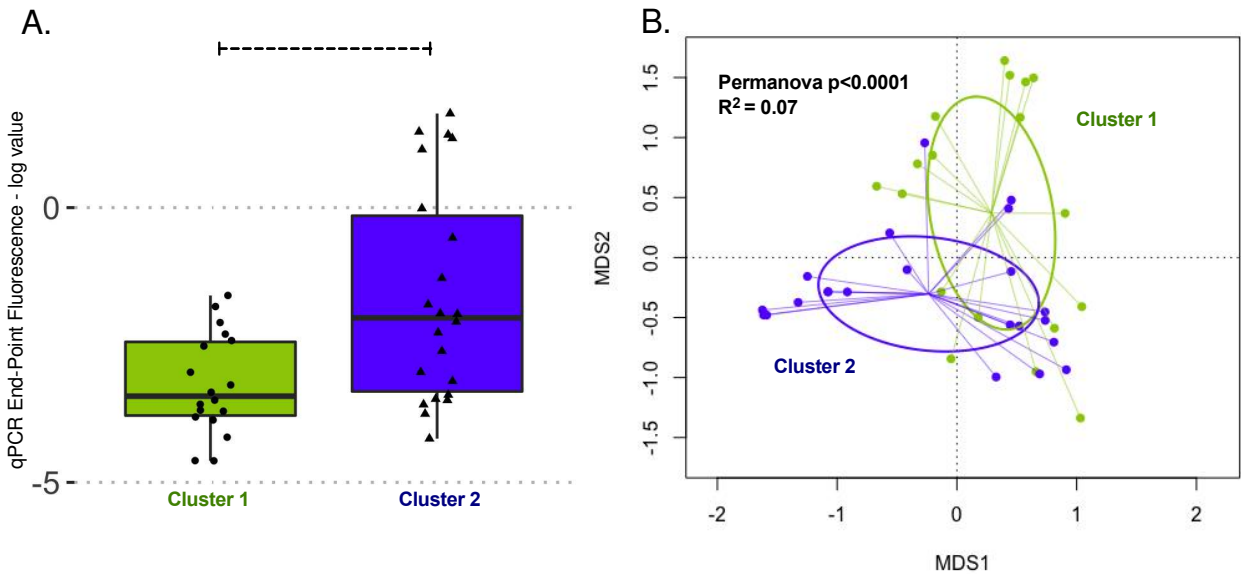

271 **Supplemental Figure 15.** Experimental negative controls had different taxonomic composition compared to IPF patient  
272 DMM clusters 1 and 2. Cluster 1 IPF samples had closer similarity to reagent controls.

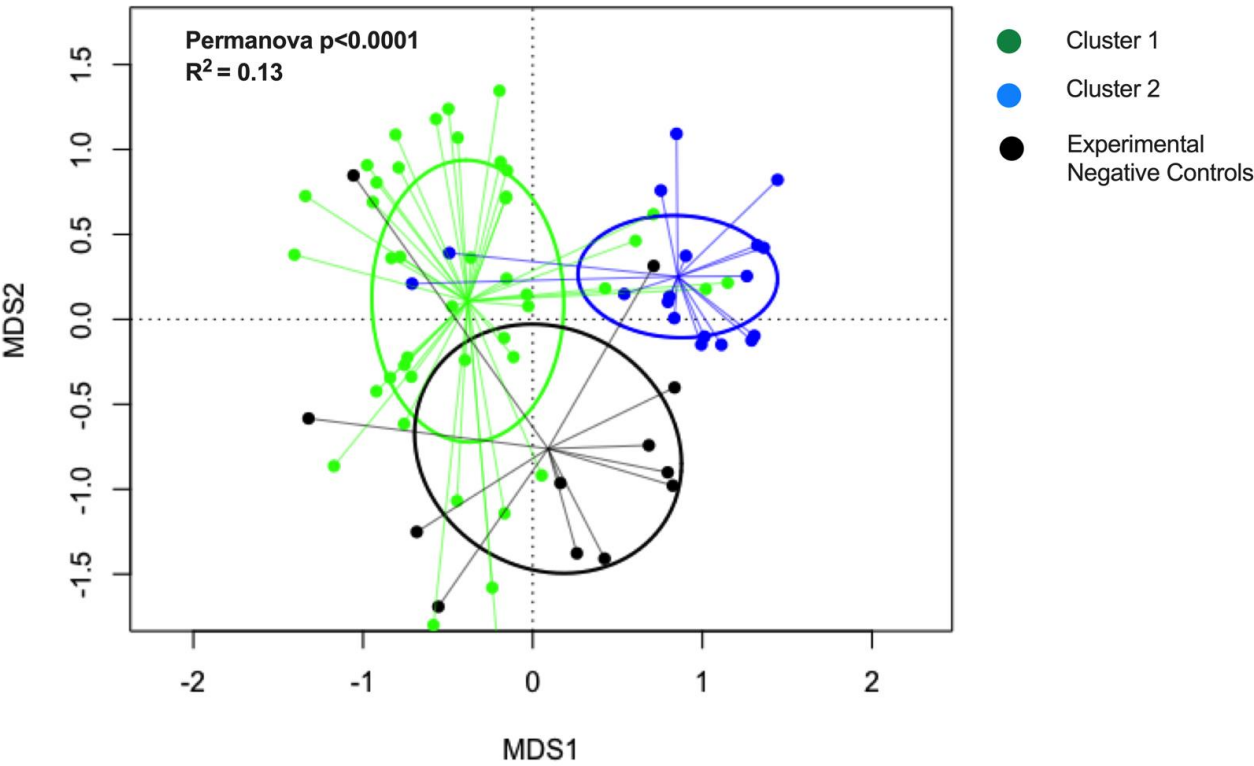

273

274   **REFERENCES**

- 275   1.       Kitsios GD, Rojas M, Kass DJ, Fitch A, Sembrat JC, Qin S, et al. Microbiome in lung explants of idiopathic  
276   pulmonary fibrosis: a case-control study in patients with end-stage fibrosis. *Thorax*. 2018 May; 73(5):481-484.  
277   2.       Caporaso JG, Lauber CL, Walters WA, Berg-Lyons D, Huntley J, Fierer N, et al. Ultra-high-throughput microbial  
278   community analysis on the Illumina HiSeq and MiSeq platforms. *ISME J*. 2012 Aug; 6(8):1621-1624.  
279   3.       Dickson RP, Huffnagle GB, Flaherty KR, White ES, Martinez FJ, Erb-Downward JR, et al. Radiographic  
280   Honeycombing and Altered Lung Microbiota in Patients with Idiopathic Pulmonary Fibrosis. *Am J Respir Crit Care Med*.  
281   2019 Dec 15; 200(12):1544-1547.  
282   4.       Spagnolo P, Molyneaux PL, Bernardinello N, Coconcelli E, Biondini D, Fracasso F, et al. The Role of the Lung's  
283   Microbiome in the Pathogenesis and Progression of Idiopathic Pulmonary Fibrosis. *Int J Mol Sci*. 2019 Nov 10; 20(22).  
284   5.       Pragman AA, Lyu T, Baller JA, Gould TJ, Kelly RF, Reilly CS, et al. The lung tissue microbiota of mild and  
285   moderate chronic obstructive pulmonary disease. *Microbiome*. 2018 Jan 9; 6(1):7.

286
